# Supplementary material for: Predicting putative adverse drug reaction related proteins based on network topological properties
Source: Royal Society of Chemistry journal article supplement (doi:10.1039/c3ay42101e), 2014-01-01
Supplement: c3ay42101e.pdf [file c3ay42101e.pdf]

**table S1    The Swiss-Prot ID of    positive set**

| Swiss-Prot ID |
|---------------|---------------|---------------|---------------|---------------|---------------|---------------|---------------|
| Q13541        | P11245        | P33261        | P35575        | P60568        | P08183        | Q08499        | O43704        |
| P08908        | Q92484        | P10635        | P11413        | P08700        | P16455        | P01210        | P40763        |
| P28223        | P00966        | P05181        | P80404        | P05112        | P14174        | P14222        | P21731        |
| P41595        | P54707        | P24903        | P22466        | P05231        | Q8N4C8        | P05164        | P01135        |
| O95264        | P05023        | P08684        | Q14376        | P10145        | P28482        | P07202        | P01137        |
| Q8WXA8        | P00846        | P31327        | P32239        | P06213        | P45983        | P43088        | P10600        |
| Q9BXI3        | P17735        | P50416        | P01350        | P48549        | Q15759        | P23219        | P00734        |
| P21589        | P61769        | P02741        | P14867        | P48544        | Q16539        | P35354        | P01033        |
| P02763        | Q92934        | P04141        | Q96CW5        | P48051        | P09238        | P14923        | P29401        |
| P08697        | P51572        | P41240        | P19440        | P35568        | P50281        | Q9NQ66        | Q9Y490        |
| P30542        | P10415        | P24310        | Q9UJ14        | Q9Y4H2        | P08254        | Q9NYY3        | P01375        |
| P17174        | P23560        | P00167        | P01215        | P08514        | P33527        | P00491        | P48788        |
| P00505        | P08236        | P61803        | P02724        | P11215        | Q92887        | P37231        | P19438        |
| O95342        | Q9UHR4        | Q14118        | O95249        | P06756        | O15438        | P05187        | P11387        |
| P19801        | Q13490        | P17707        | P07203        | P05106        | P04731        | P05186        | P11388        |
| P16219        | P30411        | P11926        | P10144        | Q9BY32        | P42898        | P32119        | P60174        |
| Q9BYF1        | P15538        | P06132        | P11021        | Q9UQF2        | P01106        | Q13162        | P51580        |
| P22303        | Q99643        | P20711        | P00390        | P05412        | P02144        | P30044        | P40225        |
| P12821        | O43497        | P17661        | P09488        | P00568        | Q9BXJ9        | O60260        | O14763        |
| P53396        | P43155        | P80365        | P11166        | P17612        | P61599        | P04070        | Q13077        |
| P11229        | P55287        | P31040        | P11168        | P15382        | P52961        | Q9UMS4        | P07204        |
| P08172        | P55289        | P21912        | P14672        | Q12809        | P00387        | P25105        | P02787        |
| P20309        | P55283        | O14521        | P13807        | P51787        | Q15788        | Q16647        | Q96RU7        |
| Q15067        | O43570        | Q00796        | P13716        | P04183        | P16435        | Q03431        | Q16881        |
| P08913        | P63098        | P30046        | P06865        | O00142        | P08473        | P01270        | P30536        |
| P00813        | Q9BWT7        | P09172        | P14210        | O43240        | Q8TCU5        | Q13882        | P07101        |
| Q08828        | P42574        | P54098        | P04035        | P03952        | Q12879        | Q05209        | P22309        |
| P07327        | P55212        | P06746        | P09601        | P17252        | Q13224        | P22695        | P19224        |
| Q15848        | Q14790        | P42658        | P00492        | Q15139        | Q14957        | P29762        | O60656        |
| P08588        | P55211        | Q12882        | P00738        | O94806        | O15399        | P10276        | P54855        |
| P07550        | P04040        | P21728        | P04196        | Q05655        | P29475        | Q06141        | P13051        |
| P12236        | P16870        | P14416        | P35367        | Q02156        | P35228        | P00797        | Q03405        |
| P06280        | P15169        | P35462        | P25021        | P05129        | P29474        | P09455        | P00749        |
| P35869        | O75828        | P21917        | O43301        | P41743        | P01303        | O00411        | P07911        |
| P31749        | P35520        | P00374        | P34931        | P24723        | Q92570        | P19793        | P37288        |
| P47895        | P24385        | Q01094        | P07900        | Q04759        | Q16656        | P55011        | P08670        |
| P24298        | P33681        | P43004        | P08107        | Q05513        | P03886        | Q4U2R8        | P18206        |
| P19021        | Q8IZL9        | P05305        | P17066        | P00338        | Q9NZT2        | P18405        | P54219        |
| Q07075        | P06276        | P00533        | Q12794        | P41159        | P41143        | O43865        | P04275        |

|        |        |        |        |        |        |        |        |
|--------|--------|--------|--------|--------|--------|--------|--------|
| P53582 | P28329 | P18146 | P07099 | O00292 | P35372 | P23526 | Q9NQW7 |
| P15144 | P02452 | O95163 | P34913 | P06858 | P02818 | P30531 | P02649 |
| P54802 | P02462 | P01588 | P10997 | P09917 | P30559 | P23975 | P41181 |
| P10275 | P21964 | P04626 | P05362 | Q86VZ4 | O00443 | P31645 | P05089 |
| Q9BY76 | P00395 | P03372 | P01567 | P16109 | P04637 | P05060 |        |
| P01019 | P13073 | O00748 | P01579 | P61626 | O15350 | Q07699 |        |
| P16066 | P04798 | P00742 | P27352 | Q02978 | P04054 | Q14524 |        |
| P21397 | P05177 | P49327 | P01583 | Q16706 | P09874 | P35247 |        |
| P27338 | P11509 | P08620 | P01584 | O00754 | P27815 | Q99720 |        |
| O94973 | P20813 | P62942 | P01589 | Q5SRI9 | Q07343 | P00441 |        |
| P05549 | P11712 | P01100 | P14784 | P02686 | Q08493 | Q12772 |        |

**table S2 The Swiss-Prot ID of test set**

| Swiss-Prot ID |
|---------------|---------------|---------------|---------------|---------------|---------------|---------------|---------------|
| A8K7I4        | P14550        | P45984        | Q16690        | P00326        | P28070        | P99999        | Q9BZX2        |
| O00180        | P14555        | P46087        | Q16698        | P00352        | P28072        | Q00169        | Q9BZZ2        |
| O00182        | P14598        | P46108        | Q16718        | P00367        | P28074        | Q00266        | Q9GZR5        |
| O00187        | P14621        | P46439        | Q16719        | P00403        | P28161        | Q00534        | Q9GZS9        |
| O00204        | P14625        | P46459        | Q16739        | P00414        | P28221        | Q00535        | Q9GZT4        |
| O00206        | P14635        | P46531        | Q16740        | P00439        | P28222        | Q00536        | Q9GZT9        |
| O00217        | P14649        | P46663        | Q16760        | P00450        | P28300        | Q00613        | Q9GZU7        |
| O00220        | P14679        | P46926        | Q16762        | P00451        | P28331        | Q00653        | Q9GZZ6        |
| O00222        | P14735        | P46976        | Q16769        | P00480        | P28335        | Q00987        | Q9H015        |
| O00244        | P14770        | P47211        | Q16772        | P00488        | P28476        | Q01064        | Q9H0M0        |
| O00253        | P14778        | P47712        | Q16773        | P00558        | P28562        | Q01082        | Q9H1D0        |
| O00254        | P14780        | P47869        | Q16774        | P00709        | P28566        | Q01344        | Q9H1K4        |
| O00273        | P14854        | P47870        | Q16775        | P00736        | P28702        | Q01362        | Q9H239        |
| O00300        | P14868        | P47871        | Q16790        | P00740        | P28799        | Q01581        | Q9H244        |
| O00305        | P14902        | P47872        | Q16795        | P00746        | P28838        | Q01650        | Q9H252        |
| O00308        | P14920        | P47898        | Q16798        | P00747        | P28845        | Q01718        | Q9H255        |
| O00329        | P14927        | P47900        | Q16831        | P00748        | P28908        | Q01959        | Q9H2G2        |
| O00341        | P15018        | P47901        | Q16836        | P00750        | P29074        | Q02127        | Q9H2M3        |
| O00408        | P15056        | P47929        | Q16850        | P00751        | P29120        | Q02153        | Q9H2P9        |
| O00459        | P15085        | P47985        | Q16853        | P00915        | P29144        | Q02218        | Q9H2S1        |
| O00483        | P15086        | P47989        | Q16873        | P00918        | P29218        | Q02221        | Q9H2X9        |
| O00519        | P15090        | P48023        | Q16877        | P01008        | P29274        | Q02223        | Q9H306        |

|        |        |        |        |        |        |        |        |
|--------|--------|--------|--------|--------|--------|--------|--------|
| O00555 | P15104 | P48029 | Q16878 | P01009 | P29275 | Q02224 | Q9H3M7 |
| O00574 | P15121 | P48039 | Q32P28 | P01023 | P29279 | Q02246 | Q9H3N8 |
| O00591 | P15151 | P48048 | Q460N3 | P01024 | P29317 | Q02252 | Q9H3S4 |
| O00626 | P15170 | P48058 | Q494W8 | P01031 | P29371 | Q02338 | Q9H479 |
| O00716 | P15248 | P48067 | Q53GD3 | P01042 | P29377 | Q02363 | Q9H490 |
| O00763 | P15259 | P48147 | Q53H96 | P01112 | P29459 | Q02548 | Q9H4B7 |
| O00764 | P15260 | P48163 | Q5IJ48 | P01116 | P29460 | Q02556 | Q9H4G4 |
| O00767 | P15289 | P48167 | Q5JPH6 | P01127 | P29466 | Q02641 | Q9H4M7 |
| O14493 | P15291 | P48169 | Q5JTZ9 | P01130 | P29508 | Q02643 | Q9H4Y5 |
| O14543 | P15391 | P48357 | Q5TDP6 | P01133 | P29597 | Q02750 | Q9H598 |
| O14556 | P15407 | P48443 | Q6IA69 | P01138 | P29803 | Q02763 | Q9H6Z9 |
| O14561 | P15428 | P48448 | Q6IB77 | P01178 | P29965 | Q02779 | Q9H869 |
| O14594 | P15509 | P48449 | Q6L8H2 | P01185 | P29972 | Q02790 | Q9H936 |
| O14646 | P15531 | P48506 | Q6NS38 | P01189 | P29992 | Q02928 | Q9HA77 |
| O14649 | P15559 | P48507 | Q6NUM9 | P01233 | P30038 | Q03013 | Q9HAB3 |
| O14672 | P15692 | P48551 | Q6NUS8 | P01236 | P30041 | Q03135 | Q9HAN9 |
| O14684 | P15813 | P48552 | Q6NVY1 | P01241 | P30043 | Q03154 | Q9HB21 |
| O14717 | P15954 | P48637 | Q6NXR0 | P01344 | P30049 | Q03181 | Q9HB40 |
| O14727 | P16050 | P48651 | Q6P093 | P01374 | P30084 | Q03393 | Q9HBA0 |
| O14732 | P16070 | P48664 | Q6P1M0 | P01574 | P30085 | Q03403 | Q9HBH5 |
| O14733 | P16083 | P48728 | Q6P996 | P01730 | P30153 | Q03426 | Q9HBL8 |
| O14735 | P16112 | P48735 | Q6PHW0 | P01764 | P30273 | Q03518 | Q9HCC0 |
| O14746 | P16118 | P48736 | Q6PI48 | P01834 | P30291 | Q03721 | Q9HCD5 |
| O14756 | P16150 | P48745 | Q6PKH6 | P01854 | P30304 | Q04206 | Q9HCP0 |
| O14757 | P16152 | P48764 | Q6UWM7 | P01859 | P30305 | Q04609 | Q9HCR9 |
| O14764 | P16220 | P49019 | Q6UWN8 | P01877 | P30307 | Q04760 | Q9NNX6 |
| O14786 | P16233 | P49069 | Q6UWP2 | P01906 | P30405 | Q04771 | Q9NP56 |
| O14788 | P16234 | P49137 | Q6WRI0 | P02458 | P30419 | Q04828 | Q9NP99 |
| O14792 | P16410 | P49146 | Q6YP21 | P02461 | P30518 | Q04844 | Q9NPA1 |
| O14793 | P16422 | P49189 | Q6ZMR3 | P02585 | P30519 | Q04864 | Q9NPA2 |
| O14795 | P16444 | P49190 | Q6ZQY3 | P02647 | P30520 | Q05084 | Q9NPB1 |
| O14818 | P16471 | P49238 | Q6ZWJ1 | P02652 | P30532 | Q05086 | Q9NPC1 |
| O14832 | P16473 | P49247 | Q71U36 | P02656 | P30550 | Q05315 | Q9NPC2 |
| O14836 | P16519 | P49257 | Q7L0J3 | P02671 | P30556 | Q05329 | Q9NPF7 |
| O14841 | P16581 | P49286 | Q7L266 | P02675 | P30613 | Q05397 | Q9NPG2 |
| O14842 | P16615 | P49336 | Q7L3T8 | P02679 | P30711 | Q05469 | Q9NPH2 |
| O14874 | P16860 | P49354 | Q7LG56 | P02689 | P30793 | Q05586 | Q9NPI8 |
| O14880 | P16871 | P49356 | Q7RTV2 | P02708 | P30825 | Q05901 | Q9NPJ3 |
| O14920 | P16930 | P49366 | Q7RTX7 | P02735 | P30837 | Q05932 | Q9NQB0 |
| O14939 | P17050 | P49368 | Q7Z2H8 | P02743 | P30838 | Q05940 | Q9NQR9 |
| O14949 | P17181 | P49411 | Q7Z2W7 | P02745 | P30872 | Q06187 | Q9NQS7 |
| O14957 | P17213 | P49419 | Q7Z2Z2 | P02746 | P30874 | Q06203 | Q9NR19 |

|        |        |        |        |        |        |        |        |
|--------|--------|--------|--------|--------|--------|--------|--------|
| O14964 | P17301 | P49441 | Q7Z4J2 | P02747 | P30926 | Q06278 | Q9NR28 |
| O14965 | P17302 | P49448 | Q7Z4W1 | P02749 | P30939 | Q06432 | Q9NR33 |
| O14983 | P17405 | P49585 | Q86SZ2 | P02760 | P30968 | Q06520 | Q9NR96 |
| O15066 | P17516 | P49588 | Q86VU5 | P02765 | P30989 | Q06609 | Q9NR97 |
| O15067 | P17538 | P49591 | Q86W47 | P02766 | P31150 | Q06643 | Q9NRA2 |
| O15105 | P17540 | P49619 | Q86W56 | P02768 | P31151 | Q07001 | Q9NRE1 |
| O15111 | P17568 | P49720 | Q86WA6 | P02771 | P31153 | Q07108 | Q9NRF9 |
| O15116 | P17600 | P49721 | Q86XF0 | P02775 | P31213 | Q07817 | Q9NRX3 |
| O15120 | P17676 | P49747 | Q86Y39 | P02776 | P31268 | Q07820 | Q9NS40 |
| O15123 | P17752 | P49759 | Q86YB8 | P02778 | P31323 | Q07837 | Q9NS75 |
| O15143 | P17787 | P49761 | Q86YT5 | P02786 | P31350 | Q07864 | Q9NS85 |
| O15144 | P17812 | P49765 | Q8IU85 | P02788 | P31358 | Q07869 | Q9NSA0 |
| O15145 | P17813 | P49768 | Q8IURO | P02790 | P31391 | Q07954 | Q9NSD9 |
| O15169 | P17900 | P49773 | Q8IUZ5 | P02792 | P31639 | Q08188 | Q9NSE4 |
| O15217 | P17931 | P49788 | Q8IVH4 | P02794 | P31644 | Q08209 | Q9NTG7 |
| O15239 | P17948 | P49789 | Q8IVL5 | P03891 | P31751 | Q08257 | Q9NUB1 |
| O15269 | P18031 | P49810 | Q8IVS2 | P03897 | P31930 | Q08289 | Q9NUV7 |
| O15270 | P18054 | P49821 | Q8IVT5 | P03901 | P31937 | Q08345 | Q9NVH6 |
| O15296 | P18085 | P49840 | Q8IWL2 | P03905 | P31939 | Q08426 | Q9NVS9 |
| O15297 | P18089 | P49862 | Q8IWT1 | P03915 | P31949 | Q08431 | Q9NWM0 |
| O15374 | P18283 | P49888 | Q8IYQ7 | P03923 | P31994 | Q08462 | Q9NWT6 |
| O15375 | P18428 | P49895 | Q8IZS8 | P03950 | P32238 | Q08722 | Q9NWZ3 |
| O15379 | P18505 | P49902 | Q8N0U8 | P03951 | P32241 | Q08752 | Q9NWZ5 |
| O15382 | P18509 | P49913 | Q8N119 | P03956 | P32245 | Q08881 | Q9NX09 |
| O15393 | P18545 | P49915 | Q8N139 | P04004 | P32246 | Q09013 | Q9NXA8 |
| O15403 | P18825 | P49916 | Q8N159 | P04049 | P32247 | Q09428 | Q9NXE4 |
| O15427 | P18847 | P49918 | Q8N1C3 | P04053 | P32297 | Q09470 | Q9NY59 |
| O15455 | P18858 | P49961 | Q8N1Q1 | P04062 | P32302 | Q10472 | Q9NY65 |
| O15460 | P19022 | P50052 | Q8N543 | P04075 | P32320 | Q10588 | Q9NY72 |
| O15511 | P19105 | P50135 | Q8N5Z0 | P04083 | P32322 | Q12756 | Q9NYA1 |
| O15519 | P19113 | P50148 | Q8N608 | P04085 | P32418 | Q12770 | Q9NYK1 |
| O15524 | P19235 | P50213 | Q8N8N7 | P04114 | P32745 | Q12778 | Q9NYQ3 |
| O15528 | P19320 | P50225 | Q8N8R3 | P04118 | P32754 | Q12797 | Q9NYR8 |
| O15530 | P19338 | P50391 | Q8N9I0 | P04156 | P32927 | Q12840 | Q9NYX4 |
| O15554 | P19404 | P50406 | Q8NBP7 | P04179 | P32929 | Q12866 | Q9NYY1 |
| O43169 | P19429 | P50440 | Q8NBQ5 | P04181 | P32970 | Q12884 | Q9NZD2 |
| O43174 | P19544 | P50548 | Q8NEB9 | P04198 | P33121 | Q12908 | Q9NZK7 |
| O43175 | P19622 | P50579 | Q8NER1 | P04211 | P33151 | Q12923 | Q9NZV8 |
| O43181 | P19634 | P50613 | Q8NET8 | P04234 | P33176 | Q13002 | Q9P0X4 |
| O43193 | P19784 | P50747 | Q8NFA2 | P04271 | P33260 | Q13003 | Q9P0Z9 |
| O43246 | P19835 | P50750 | Q8NFJ5 | P04350 | P33402 | Q13085 | Q9P289 |
| O43252 | P19875 | P50897 | Q8NFT2 | P04406 | P33908 | Q13093 | Q9P2J5 |

|        |        |        |        |        |        |        |        |
|--------|--------|--------|--------|--------|--------|--------|--------|
| O43272 | P19883 | P50993 | Q8NFW8 | P04424 | P33981 | Q13126 | Q9P2R7 |
| O43293 | P19961 | P51003 | Q8NI22 | P04629 | P33993 | Q13133 | Q9P2W7 |
| O43353 | P19971 | P51149 | Q8TAA9 | P04632 | P34096 | Q13163 | Q9UBC3 |
| O43424 | P20061 | P51151 | Q8TBC4 | P04745 | P34741 | Q13183 | Q9UBF6 |
| O43447 | P20132 | P51161 | Q8TC12 | P04746 | P34896 | Q13200 | Q9UBG0 |
| O43451 | P20138 | P51168 | Q8TCC7 | P04792 | P34897 | Q13202 | Q9UBK8 |
| O43525 | P20151 | P51170 | Q8TD30 | P04818 | P34903 | Q13231 | Q9UBM1 |
| O43526 | P20231 | P51511 | Q8TDU6 | P04839 | P34949 | Q13233 | Q9UBM7 |
| O43541 | P20248 | P51512 | Q8TDV5 | P05019 | P34969 | Q13255 | Q9UBN7 |
| O43603 | P20273 | P51553 | Q8TE23 | P05062 | P34972 | Q13258 | Q9UBQ6 |
| O43612 | P20292 | P51570 | Q8TED1 | P05067 | P34981 | Q13285 | Q9UBS5 |
| O43613 | P20333 | P51587 | Q8TET4 | P05091 | P34995 | Q13296 | Q9UBT6 |
| O43614 | P20339 | P51606 | Q8TF76 | P05093 | P34998 | Q13309 | Q9UBU3 |
| O43617 | P20472 | P51659 | Q8WTS6 | P05107 | P35030 | Q13324 | Q9UBX1 |
| O43653 | P20594 | P51677 | Q8WTV0 | P05108 | P35080 | Q13332 | Q9UBX3 |
| O43674 | P20618 | P51679 | Q8WUI4 | P05109 | P35218 | Q13362 | Q9UDR5 |
| O43676 | P20645 | P51681 | Q8WVQ1 | P05113 | P35219 | Q13363 | Q9UDW1 |
| O43677 | P20648 | P51685 | Q8WW43 | P05120 | P35222 | Q13370 | Q9UDX3 |
| O43678 | P20674 | P51687 | Q8WWL2 | P05121 | P35225 | Q13393 | Q9UDX4 |
| O43681 | P20701 | P51692 | Q8WWM9 | P05141 | P35237 | Q13418 | Q9UGH3 |
| O43708 | P20783 | P51788 | Q8WWT9 | P05154 | P35241 | Q13423 | Q9UGI6 |
| O43741 | P20809 | P51800 | Q8WX39 | P05162 | P35243 | Q13426 | Q9UGM1 |
| O43766 | P20810 | P51843 | Q8WY07 | P05165 | P35270 | Q13427 | Q9UGM6 |
| O43772 | P20815 | P51857 | Q92506 | P05166 | P35318 | Q13464 | Q9UGN5 |
| O43776 | P20823 | P51955 | Q92523 | P05230 | P35346 | Q13477 | Q9UHA3 |
| O43837 | P20839 | P51970 | Q92569 | P05451 | P35368 | Q13489 | Q9UHC9 |
| O43915 | P20916 | P52209 | Q92633 | P05452 | P35398 | Q13507 | Q9UHF1 |
| O43920 | P20941 | P52333 | Q92637 | P05546 | P35408 | Q13509 | Q9UHI5 |
| O60218 | P20963 | P52732 | Q92696 | P05787 | P35499 | Q13526 | Q9UHQ9 |
| O60235 | P21246 | P52757 | Q92731 | P05981 | P35558 | Q13542 | Q9UHW9 |
| O60240 | P21266 | P52758 | Q92736 | P06126 | P35610 | Q13547 | Q9UHY7 |
| O60262 | P21281 | P52788 | Q92769 | P06239 | P35626 | Q13554 | Q9UI09 |
| O60264 | P21283 | P52799 | Q92781 | P06241 | P35754 | Q13557 | Q9UI32 |
| O60294 | P21333 | P52823 | Q92793 | P06307 | P35790 | Q13564 | Q9UI33 |
| O60344 | P21439 | P52848 | Q92820 | P06396 | P35914 | Q13613 | Q9UIC8 |
| O60391 | P21452 | P52895 | Q92826 | P06400 | P35968 | Q13621 | Q9UJ68 |
| O60427 | P21453 | P53004 | Q92830 | P06401 | P36021 | Q13627 | Q9UJ70 |
| O60488 | P21462 | P53350 | Q92831 | P06576 | P36222 | Q13630 | Q9UJ72 |
| O60493 | P21549 | P53355 | Q92835 | P06702 | P36405 | Q13641 | Q9UJM8 |
| O60494 | P21554 | P53597 | Q92843 | P06729 | P36507 | Q13698 | Q9UJS0 |
| O60512 | P21580 | P53602 | Q92847 | P06731 | P36542 | Q13748 | Q9UJT0 |
| O60513 | P21673 | P53609 | Q92876 | P06732 | P36544 | Q13751 | Q9UJT1 |

|        |        |        |        |        |        |        |        |
|--------|--------|--------|--------|--------|--------|--------|--------|
| O60547 | P21695 | P53611 | Q92905 | P06737 | P36871 | Q13838 | Q9UK17 |
| O60551 | P21741 | P53634 | Q92911 | P06744 | P36873 | Q13907 | Q9UK23 |
| O60565 | P21757 | P53674 | Q92930 | P06850 | P36888 | Q13946 | Q9UKL6 |
| O60568 | P21796 | P53778 | Q92947 | P06870 | P36896 | Q13956 | Q9UKM7 |
| O60603 | P21817 | P53779 | Q92952 | P07098 | P36897 | Q14032 | Q9UKP6 |
| O60658 | P21860 | P53985 | Q93088 | P07148 | P36952 | Q14061 | Q9UKQ2 |
| O60664 | P21918 | P54278 | Q95460 | P07195 | P36955 | Q14116 | Q9UKU7 |
| O60669 | P21926 | P54284 | Q969F8 | P07225 | P36959 | Q14164 | Q9UKY3 |
| O60674 | P21980 | P54289 | Q969G6 | P07237 | P36969 | Q14181 | Q9UL17 |
| O60678 | P22001 | P54368 | Q969P6 | P07288 | P37023 | Q14209 | Q9UL51 |
| O60701 | P22033 | P54577 | Q969V1 | P07307 | P37058 | Q14210 | Q9UL54 |
| O60733 | P22061 | P54687 | Q969V6 | P07333 | P37059 | Q14242 | Q9ULA0 |
| O60755 | P22102 | P54760 | Q96A70 | P07339 | P37088 | Q14289 | Q9ULC6 |
| O60760 | P22301 | P54819 | Q96AZ6 | P07360 | P37268 | Q14314 | Q9ULK0 |
| O60779 | P22314 | P54868 | Q96BH3 | P07384 | P38435 | Q14330 | Q9ULW8 |
| O60825 | P22352 | P54886 | Q96C24 | P07437 | P38484 | Q14416 | Q9ULX7 |
| O60840 | P22392 | P55017 | Q96C36 | P07451 | P38606 | Q14432 | Q9ULZ9 |
| O60858 | P22413 | P55055 | Q96C86 | P07477 | P38936 | Q14494 | Q9UM07 |
| O60882 | P22455 | P55058 | Q96CD2 | P07510 | P39023 | Q14512 | Q9UM73 |
| O60890 | P22459 | P55061 | Q96D31 | P07585 | P39086 | Q14534 | Q9UMX2 |
| O60894 | P22460 | P55072 | Q96DP5 | P07602 | P39900 | Q14541 | Q9UN19 |
| O60895 | P22557 | P55085 | Q96EB6 | P07686 | P40189 | Q14566 | Q9UN76 |
| O60896 | P22570 | P55157 | Q96EM0 | P07711 | P40198 | Q14571 | Q9UN88 |
| O60906 | P22607 | P55210 | Q96EN8 | P07737 | P40199 | Q14573 | Q9UNA0 |
| O60909 | P22681 | P55263 | Q96EY8 | P07741 | P40238 | Q14626 | Q9UNI1 |
| O60911 | P22748 | P55769 | Q96FI4 | P07766 | P40261 | Q14627 | Q9UNK4 |
| O60939 | P22749 | P55786 | Q96GA7 | P07814 | P40394 | Q14653 | Q9UNN8 |
| O75015 | P22888 | P55789 | Q96GD0 | P07858 | P40429 | Q14654 | Q9UNP4 |
| O75116 | P22891 | P55809 | Q96GD3 | P07864 | P40616 | Q14703 | Q9UNX3 |
| O75173 | P22894 | P55851 | Q96GD4 | P07919 | P40925 | Q14721 | Q9UP95 |
| O75251 | P22897 | P55899 | Q96GR2 | P07947 | P40926 | Q14749 | Q9UPY3 |
| O75293 | P23025 | P55916 | Q96HD9 | P07949 | P40933 | Q14831 | Q9UPY5 |
| O75306 | P23258 | P56181 | Q96I15 | P07998 | P40937 | Q14832 | Q9UQB9 |
| O75311 | P23280 | P56192 | Q96I59 | P08048 | P40939 | Q14833 | Q9Y210 |
| O75362 | P23284 | P56279 | Q96I99 | P08069 | P41091 | Q14914 | Q9Y219 |
| O75365 | P23297 | P56282 | Q96IY4 | P08100 | P41145 | Q15031 | Q9Y234 |
| O75380 | P23368 | P56373 | Q96KC2 | P08123 | P41146 | Q15072 | Q9Y243 |
| O75390 | P23378 | P56524 | Q96KS0 | P08138 | P41180 | Q15075 | Q9Y251 |
| O75438 | P23381 | P56556 | Q96L21 | P08173 | P41231 | Q15077 | Q9Y257 |
| O75460 | P23416 | P56696 | Q96L73 | P08185 | P41235 | Q15078 | Q9Y271 |
| O75469 | P23434 | P56817 | Q96LB9 | P08217 | P41250 | Q15102 | Q9Y275 |
| O75473 | P23443 | P56937 | Q96LZ3 | P08235 | P41252 | Q15109 | Q9Y285 |

|        |        |        |        |        |        |        |        |
|--------|--------|--------|--------|--------|--------|--------|--------|
| O75489 | P23458 | P59768 | Q96MA6 | P08238 | P41279 | Q15118 | Q9Y286 |
| O75493 | P23469 | P59796 | Q96NR8 | P08243 | P41594 | Q15119 | Q9Y289 |
| O75496 | P23471 | P59998 | Q96NX5 | P08246 | P41597 | Q15120 | Q9Y296 |
| O75521 | P23528 | P60484 | Q96NY8 | P08253 | P41732 | Q15172 | Q9Y2B2 |
| O75600 | P23677 | P60880 | Q96PD7 | P08263 | P41970 | Q15181 | Q9Y2D0 |
| O75604 | P23743 | P60900 | Q96Q40 | P08311 | P42081 | Q15274 | Q9Y2I1 |
| O75676 | P23763 | P60953 | Q96Q83 | P08319 | P42126 | Q15303 | Q9Y2J8 |
| O75715 | P23786 | P60981 | Q96QT4 | P08519 | P42224 | Q15375 | Q9Y2Q0 |
| O75746 | P23919 | P61024 | Q96QU6 | P08559 | P42261 | Q15382 | Q9Y2U5 |
| O75762 | P23921 | P61158 | Q96RD7 | P08571 | P42262 | Q15389 | Q9Y2Z4 |
| O75832 | P23945 | P61221 | Q96RI0 | P08574 | P42330 | Q15392 | Q9Y345 |
| O75865 | P23946 | P61278 | Q96RJ0 | P08575 | P42336 | Q15413 | Q9Y3I0 |
| O75874 | P24046 | P61313 | Q96RJ3 | P08631 | P42338 | Q15466 | Q9Y3Q0 |
| O75879 | P24071 | P61457 | Q96RQ3 | P08637 | P42345 | Q15596 | Q9Y3R4 |
| O75891 | P24311 | P61586 | Q96S37 | P08648 | P42357 | Q15648 | Q9Y468 |
| O75899 | P24347 | P61587 | Q96SL4 | P08709 | P42684 | Q15717 | Q9Y478 |
| O75900 | P24386 | P61925 | Q99250 | P08727 | P42768 | Q15722 | Q9Y4U1 |
| O75907 | P24387 | P61927 | Q99259 | P08729 | P42773 | Q15738 | Q9Y4W6 |
| O75908 | P24394 | P62158 | Q99436 | P08758 | P42892 | Q15746 | Q9Y5K3 |
| O75911 | P24530 | P62258 | Q99456 | P08833 | P43003 | Q15758 | Q9Y5N1 |
| O75936 | P24557 | P62312 | Q99460 | P08842 | P43005 | Q15761 | Q9Y5R2 |
| O75976 | P24592 | P62330 | Q99470 | P08887 | P43007 | Q15796 | Q9Y5R8 |
| O76054 | P24666 | P62487 | Q99497 | P08912 | P43080 | Q15797 | Q9Y5Y4 |
| O76070 | P24752 | P62491 | Q99519 | P09012 | P43116 | Q15800 | Q9Y5Y6 |
| O76074 | P24821 | P62508 | Q99542 | P09038 | P43119 | Q15822 | Q9Y5Y9 |
| O76075 | P24855 | P62714 | Q99571 | P09104 | P43121 | Q15825 | Q9Y600 |
| O76082 | P24864 | P62745 | Q99572 | P09210 | P43166 | Q15842 | Q9Y617 |
| O76083 | P24941 | P62750 | Q99584 | P09211 | P43220 | Q15878 | Q9Y619 |
| O94759 | P25024 | P62826 | Q99640 | P09237 | P43235 | Q16099 | Q9Y646 |
| O94760 | P25025 | P62829 | Q99661 | P09341 | P43246 | Q16134 | Q9Y663 |
| O94766 | P25090 | P62837 | Q99665 | P09382 | P43354 | Q16270 | Q9Y666 |
| O94768 | P25092 | P62873 | Q99683 | P09417 | P43357 | Q16445 | Q9Y678 |
| O94788 | P25098 | P62913 | Q99705 | P09429 | P43358 | Q16478 | Q9Y689 |
| O94832 | P25100 | P62917 | Q99707 | P09466 | P43403 | Q16552 | Q9Y691 |
| O94903 | P25101 | P62937 | Q99714 | P09467 | P43405 | Q16558 | Q9Y697 |
| O94907 | P25103 | P62993 | Q99735 | P09486 | P43489 | Q16566 | Q9Y6B6 |
| O94925 | P25116 | P63027 | Q99795 | P09543 | P43490 | Q16568 | Q9Y6D9 |
| O94956 | P25311 | P63096 | Q99798 | P09603 | P43681 | Q16602 | Q9Y6F1 |
| O94992 | P25398 | P63151 | Q99808 | P09619 | P43694 | Q16613 | Q9Y6I3 |
| O95069 | P25445 | P63208 | Q99814 | P09622 | P45379 | Q16644 | Q9Y6L7 |
| O95125 | P25685 | P63211 | Q99835 | P09651 | P45381 | Q16651 | Q9Y6M9 |
| O95139 | P25705 | P63316 | Q99836 | P09668 | P45452 | Q16654 | Q9Y6Q6 |

|        |        |        |        |        |        |        |        |
|--------|--------|--------|--------|--------|--------|--------|--------|
| O95167 | P25774 | P67775 | Q99873 | P09669 | P45844 | Q16658 | Q9Y6Q9 |
| O95168 | P25787 | P68133 | Q99884 | P09681 | P45877 | Q16665 | Q9Y6R4 |
| O95169 | P25788 | P68363 | Q99928 | P09693 | P45880 | Q16671 | Q9Y6W8 |
| O95178 | P25789 | P68366 | Q99956 | P09848 | P45954 | Q16678 | Q9Y6Y9 |
| O95180 | P25791 | P68371 | Q99973 | P09871 | P13501 | P12004 | P11177 |
| O95182 | P25815 | P68400 | Q99988 | P09884 | P13569 | P12081 | P11216 |
| O95190 | P25874 | P68871 | Q9BQB6 | P09919 | P13612 | P12235 | P11217 |
| O95237 | P25929 | P69891 | Q9BQE3 | P09936 | P13631 | P12259 | P11226 |
| O95263 | P25942 | P69905 | Q9BTZ2 | P09958 | P13639 | P12268 | P11230 |
| O95298 | P26010 | P78330 | Q9BVA1 | P09960 | P13688 | P12271 | P11233 |
| O95299 | P26196 | P78334 | Q9BVG9 | P0C0L4 | P13725 | P12277 | P11362 |
| O95363 | P26358 | P78362 | Q9BVJ7 | P0C0L5 | P13726 | P12314 | P11473 |
| O95389 | P26440 | P78368 | Q9BVM4 | P0CG04 | P13727 | P12318 | P11474 |
| O95425 | P26441 | P78380 | Q9BW19 | P0CG29 | P13798 | P12319 | P11488 |
| O95470 | P26447 | P78417 | Q9BW91 | P0CG47 | P13866 | P12429 | P11498 |
| O95477 | P26572 | P78423 | Q9BW92 | P0CG48 | P13929 | P12532 | P11511 |
| O95479 | P26639 | P78508 | Q9BWD1 | P0DI81 | P13945 | P12724 | P11586 |
| O95573 | P26640 | P78527 | Q9BXA5 | P0DJ8  | P13995 | P12830 | P11597 |
| O95622 | P26678 | P78536 | Q9BXI2 | P10082 | P14061 | P12883 | P11678 |
| O95633 | P26951 | P78540 | Q9BXJ7 | P10109 | P14151 | P12931 | P11684 |
| O95665 | P26992 | P78552 | Q9BY41 | P10114 | P14207 | P12955 | P11717 |
| O95749 | P27169 | P80075 | Q9BY49 | P10147 | P14324 | P13196 | P11766 |
| O95831 | P27361 | P80188 | Q9BY66 | P10153 | P14410 | P13497 | P11802 |
| O95838 | P27487 | P80511 | Q9BYC2 | P10176 | P14543 | P13500 | P11836 |
| O95864 | P27695 | P82251 | Q9BYV1 | P10253 | P10696 | P10809 | P10914 |
| O95865 | P27707 | P84022 | Q9BYZ2 | P10398 | P10721 | P10827 | P11086 |
| O95881 | P27708 | P84077 | Q9BYZ8 | P10451 | P10745 | P10828 | P11137 |
| O95907 | P27797 | P84098 | Q9BZ11 | P10515 | P10747 | P10909 | P11142 |
| O95954 | P27824 | P98160 | Q9BZJ3 | P10599 | P10768 | P10912 | P11172 |
| O95989 | P27930 | P98164 | Q9BZR6 | P10606 | P10646 | P10644 | P10632 |
| O96000 | P27986 | P98170 | Q9BZV2 | P10620 | P28066 | P98194 | Q9BZW2 |
| P00156 |        |        |        |        |        |        |        |



**table S3 583 targets that were predicted to be ADRRPs**

| Swiss-Prot ID | gene name | Swiss-Prot ID | gene name              | Swiss-Prot ID | gene name | Swiss-Prot ID | gene name |
|---------------|-----------|---------------|------------------------|---------------|-----------|---------------|-----------|
| P62258        | YWHAE     | P06307        | CCK                    | P08246        | ELANE     | Q14116        | IL18      |
| P28222        | HTR1B     | P13500        | CCL2                   | P13929        | ENO3      | P14778        | IL1R1     |
| P28221        | HTR1D     | P13501        | CCL5                   | P09104        | ENO2      | P26951        | IL3RA     |
| P28335        | HTR2C     | P20248        | CCNA2                  | P14625        | HSP90B1   | P24394        | IL4R      |
| P01009        | SERPINA1  | P14635        | CCNB1                  | P22413        | ENPP1     | P05113        | IL5       |
| P01023        | A2M       | P24864        | CCNE1                  | P16422        | EPCAM     | P40189        | IL6ST     |
| P05067        | APP       | P41597        | CCR2                   | P29317        | EPHA2     | P15248        | IL9       |
| P29274        | ADORA2A   | P51677        | CCR3                   | P19235        | EPOR      | P15260        | IFNGR1    |
| P29275        | ADORA2B   | P08571        | CD14                   | P21860        | ERBB3     | P10914        | IRF1      |
| O95477        | ABCA1     | P15391        | CD19                   | Q15303        | ERBB4     | Q14654        | KCNJ11    |
| Q09428        | ABCC8     | P06126        | CD1A                   | P11474        | ESRRA     | P48048        | KCNJ1     |
| P45844        | ABCG1     | P15813        | CD1D                   | P10768        | ESD       | P13612        | ITGA4     |
| Q13085        | ACACA     | P10747        | CD28                   | P00488        | F13A1     | P08648        | ITGA5     |
| P43681        | CHRNA4    | P06729        | CD2                    | P12259        | F5        | P20701        | ITGAL     |
| P02708        | CHRNA1    | P20138        | CD33                   | P08709        | F7        | P05107        | ITGB2     |
| O00767        | SCD       | P04234        | CD3D                   | P00451        | F8        | P26010        | ITGB7     |
| P33121        | ACSL1     | P20963        | CD247                  | P00740        | F9        | Q14573        | ITPR3     |
| Q01718        | MC2R      | P29965        | CD40LG                 | P15090        | FABP4     | P26440        | IVD       |
| P68133        | ACTA1     | P16070        | CD44                   | P07148        | FABP1     | P23458        | JAK1      |
| P37023        | ACVRL1    | P01730        | CD4                    | P12318        | FCGR2A    | P52333        | JAK3      |
| O14672        | ADAM10    | Q07108        | CD69                   | P31994        | FCGR2B    | P05787        | KRT8      |
| P35368        | ADRA1B    | P42081        | CD86                   | P02771        | AFP       | P31323        | PRKAR2B   |
| P25100        | ADRA1D    | P21926        | CD9                    | P02765        | AHSG      | P22001        | KCNA3     |
| O95622        | ADCY5     | P32320        | CDA                    | P05230        | FGF1      | P22460        | KCNA5     |
| P00326        | ADH1C     | P11802        | CDK4                   | P09038        | FGF2      | P12277        | CKB       |
| P40394        | ADH7      | Q00535        | CDK5                   | P11362        | FGFR1     | P06732        | CKM       |
| P35318        | ADM       | P38936        | CDKN1A                 | P22607        | FGFR3     | P10721        | KIT       |
| P13945        | ADRB3     | P49918        | CDKN1C                 | P02675        | FGB       | P06870        | KLK1      |
| P22570        | FDXR      | P17676        | CEBPB                  | P02679        | FGG       | P20151        | KLK2      |
| P12235        | SLC25A4   | P00450        | CP                     | Q02790        | FKBP4     | P07288        | KLK3      |
| P30556        | AGTR1     | P11597        | CETP                   | P15407        | FOSL1     | P49862        | KLK7      |
| O95831        | AIFM1     | P00746        | CFD                    | Q12778        | FOXO1     | P01042        | KNG1      |
| P42330        | AKR1C3    | O15519        | CFLAR                  | P25090        | FPR2      | P30613        | PKLR      |
| P31751        | AKT2      | P13569        | CFTR                   | P02794        | FTH1      | P43405        | SYK       |
| P00352        | ALDH1A1   | P01233        | CGB/CGB5/<br>CGB7/CGB8 | P02792        | FTL       | P18428        | LBP       |
| O94788        | ALDH1A2   | P32929        | CTH                    | P09958        | FURIN     | P06239        | LCK       |
| P20292        | ALOX5AP   | P36222        | CHI3L1                 | P06241        | FYN       | P07195        | LDHB      |

|        |          |        |         |        |        |        |          |
|--------|----------|--------|---------|--------|--------|--------|----------|
| P02768 | ALB      | P10809 | HSPD1   | O95479 | H6PD   | P07864 | LDHC     |
| P05091 | ALDH2    | P10909 | CLU     | P06744 | GPI    | P01130 | LDLR     |
| P04075 | ALDOA    | P23946 | CMA1    | P43694 | GATA4  | P17931 | LGALS3   |
| P05062 | ALDOB    | P21554 | CNR1    | P78334 | GABRE  | P48357 | LEPR     |
| P15121 | AKR1B1   | P34972 | CNR2    | P30793 | GCH1   | P16150 | SPN      |
| P55789 | GFER     | P26441 | CNTF    | P10912 | GHR    | P15018 | LIF      |
| P28838 | LAP3     | Q02246 | CNTN2   | P09681 | GIP    | Q05469 | LIPE     |
| P19961 | AMY2B    | P08123 | COL1A2  | P04062 | GBA    | P09960 | LTA4H    |
| P16860 | NPPB     | P02458 | COL2A1  | P15104 | GLUL   | P18054 | ALOX12   |
| P03950 | ANG      | P02461 | COL3A1  | P43220 | GLP1R  | P16050 | ALOX15   |
| O15123 | ANGPT2   | P01024 | C3      | P35754 | GLRX   | P09848 | LCT      |
| P01008 | SERPINC1 | P23528 | CFL1    | P47871 | GCGR   | Q07954 | LRP1     |
| P04083 | ANXA1    | P01189 | POMC    | P46976 | GYG1   | P98164 | LRP2     |
| P08758 | ANXA5    | P10176 | COX8A   | P29992 | GNA11  | P22888 | LHCGR    |
| O14727 | APAF1    | P05108 | CYP11A1 | P50148 | GNAQ   | P10253 | GAA      |
| P27695 | APEX1    | P05093 | CYP17A1 | P30968 | GNRHR  | P14151 | SELL     |
| P02647 | APOA1    | P11511 | CYP19A1 | P18283 | GPX2   | P16581 | SELE     |
| P02652 | APOA2    | P10632 | CYP2C8  | P22352 | GPX3   | P28300 | LOX      |
| P04114 | APOB     | P20815 | CYP3A5  | P42261 | GRIA1  | Q13233 | MAP3K1   |
| P02656 | APOC3    | Q02928 | CYP4A11 | P42262 | GRIA2  | P20916 | MAG      |
| P02749 | APOH     | P16220 | CREB1   | P39086 | GRIK1  | P48163 | ME1      |
| P07741 | APRT     | P34998 | CRHR1   | P41594 | GRM5   | P11137 | MAP2     |
| P29972 | AQP1     | P06850 | CRH     | P28799 | GRN    | P49137 | MAPKAPK2 |
| P10398 | ARAF     | P46108 | CRK     | P48507 | GCLM   | Q14703 | MBTPS1   |
| P25098 | ADRBK1   | P07333 | CSF1R   | P48506 | GCLC   | P32245 | MC4R     |
| P62330 | ARF6     | P09603 | CSF1    | P48637 | GSS    | Q07820 | MCL1     |
| P04424 | ASL      | P15509 | CSF2RA  | P08263 | GSTA1  | P08235 | NR3C2    |
| P15289 | ARSA     | P09919 | CSF3    | P09210 | GSTA2  | P21439 | ABCB4    |
| P17405 | SMPD1    | P29279 | CTGF    | P28161 | GSTM2  | P31153 | MAT2A    |
| P08243 | ASNS     | P16410 | CTLA4   | P21266 | GSTM3  | P10620 | MGST1    |
| P50993 | ATP1A2   | P35222 | CTNNA1  | P09211 | GSTP1  | P27361 | MAPK3    |
| P16615 | ATP2A2   | P30825 | SLC7A1  | P69891 | HBG1   | P45984 | MAPK9    |
| P18847 | ATF3     | P17302 | GJA1    | O15379 | HDAC3  | P21741 | MDK      |
| O15169 | AXIN1    | P19875 | CXCL2   | P22557 | ALAS2  | P24347 | MMP11    |
| Q07817 | BCL2L1   | P02775 | PPBP    | P13196 | ALAS1  | P39900 | MMP12    |
| P56817 | BACE1    | P25024 | CXCR1   | P02790 | HPX    | P45452 | MMP13    |
| P55061 | TMBIM6   | P25025 | CXCR2   | P07686 | HEXB   | P03956 | MMP1     |
| O14788 | TNFSF11  | P32302 | CXCR5   | P54868 | HMGCS2 | P08253 | MMP2     |
| Q13489 | BIRC3    | P02778 | CXCL10  | P09429 | HMGB1  | P09237 | MMP7     |
| P13497 | BMP1     | P04839 | CYBB    | P30519 | HMOX2  | P22894 | MMP8     |
| P17213 | BPI      | P00156 | MT-CYB  | P20823 | HNF1A  | P14780 | MMP9     |
| P15056 | BRAF     | P99999 | CYCS    | P41235 | HNF4A  | Q02750 | MAP2K1   |

|        |          |        |           |        |          |        |           |
|--------|----------|--------|-----------|--------|----------|--------|-----------|
| Q06187 | BTK      | Q05329 | GAD2      | P08238 | HSP90AB1 | P36507 | MAP2K2    |
| P54289 | CACNA2D1 | P19113 | HDC       | Q00613 | HSF1     | Q13163 | MAP2K5    |
| P12830 | CDH1     | P27707 | DCK       | P11142 | HSPA8    | P30305 | CDC25B    |
| P19022 | CDH2     | P14061 | HSD17B1   | P04792 | HSPB1    | P34949 | MPI       |
| P33151 | CDH5     | P00367 | GLUD1     | P14902 | IDO1     | P20645 | M6PR      |
| P00918 | CA2      | P49448 | GLUD2     | P08833 | IGFBP1   | P11717 | IGF2R     |
| P22748 | CA4      | P28845 | HSD11B1   | P20810 | CAST     | P43246 | MSH2      |
| P62158 | CALM1    | P09417 | QDPR      | P14735 | IDE      | P21757 | MSR1      |
| P27797 | CALR     | P24855 | DNASE1    | P50213 | IDH3A    | P42345 | MTOR      |
| P27824 | CANX     | P26358 | DNMT1     | P48735 | IDH2     | P43121 | MCAM      |
| P07384 | CAPN1    | P27487 | DPP4      | P01574 | IFNB1    | P04198 | MYCN      |
| Q16568 | CARTPT   | P21918 | DRD5      | P08069 | IGF1R    | P12883 | MYH7      |
| P29466 | CASP1    | P28562 | DUSP1     | P05019 | IGF1     | Q15746 | MYLK      |
| P55210 | CASP7    | P43003 | SLC1A3    | P01344 | IGF2     | P32418 | SLC8A1    |
| P41180 | CASR     | P42892 | ECE1      | O15111 | CHUK     | P43490 | NAMPT     |
| P53634 | CTSC     | P12724 | RNASE3    | O14920 | IKBKB    | P14598 | NCF1      |
| P07339 | CTSD     | P25101 | EDNRA     | P22301 | IL10     | P15531 | NME1      |
| P08311 | CTSG     | P24530 | EDNRB     | P20809 | IL11     | P29120 | PCSK1     |
| P07711 | CTSL1    | P01133 | EGF       | P29460 | IL12B    | P16519 | PCSK2     |
| P25774 | CTSS     | P17813 | ENG       | P35225 | IL13     | P01185 | AVP       |
| P22681 | CBL      | Q15717 | ELAVL1    | Q16552 | IL17A    | Q00653 | NFKB2     |
| P01138 | NGF      | P02735 | SAA1/SAA2 | P45877 | PPIC     | P30518 | AVPR2     |
| P25103 | TACR1    | P02743 | APCS      | P30405 | PPIF     | P63027 | VAMP2     |
| Q05586 | GRIN1    | P07602 | PSAP      | Q13427 | PPIG     | P19320 | VCAM1     |
| P15559 | NQO1     | Q01959 | SLC6A3    | P26678 | PLN      | P21796 | VDAC1     |
| P16083 | NQO2     | Q12770 | SCAP      | P30041 | PRDX6    | P11473 | VDR       |
| Q15466 | NR0B2    | P35499 | SCN4A     | P06401 | PGR      | P15692 | VEGFA     |
| Q13133 | NR1H3    | P37088 | SCNN1A    | P16471 | PRLR     | P17948 | FLT1      |
| P43354 | NR4A2    | P51168 | SCNN1B    | P01236 | PRL      | P35968 | VEGFR2    |
| P68871 | HBB      | P51170 | SCNN1G    | P07225 | PROS1    | P04004 | VTN       |
| P04629 | NTRK1    | P34741 | SDC2      | P20472 | PVALB    | P19544 | WT1       |
| P03891 | MT-ND2   | P19634 | SLC9A1    | P28066 | PSMA5    | P47989 | XDH       |
| P04181 | OAT      | P60880 | SNAP25    | P60484 | PTEN     | P98170 | XIAP      |
| P13725 | OSM      | P35610 | SOAT1     | O14684 | PTGES    | P23025 | XPA       |
| P41145 | OPRK1    | O15524 | SOCS1     | P18031 | PTPN1    | P07947 | YES1      |
| P04406 | GAPDH    | O14543 | SOCS3     | P08575 | PTPRC    | P43403 | ZAP70     |
| P08100 | RHO      | P04179 | SOD2      | P31939 | ATIC     | P40238 | MPL       |
| O43612 | HCRT     | P35237 | SERPINB6  | P11217 | PYGM     | O00220 | TNFRSF10A |
| P10451 | SPP1     | P09486 | SPARC     | Q02127 | DHODH    | P16473 | TSHR      |
| P00480 | OTC      | P12931 | SRC       | Q08257 | CRYZ     | P02766 | TTR       |
| P14920 | DAO      | P30874 | SSTR2     | P04049 | RAF1     | P29597 | TYK2      |
| P47900 | P2RY1    | P32745 | SSTR3     | P11233 | RALA     | P19971 | TYMP      |

|        |          |        |         |        |         |        |          |
|--------|----------|--------|---------|--------|---------|--------|----------|
| P41231 | P2RY2    | P35346 | SSTR5   | P13631 | RARG    | P27169 | PON1     |
| P32322 | PYCR1    | P50225 | SULT1A1 | P01112 | HRAS    | Q08209 | PPP3CA   |
| P27986 | PIK3R1   | Q06520 | SULT2A1 | P01116 | KRAS    | P24666 | ACP1     |
| P47712 | PLA2G4A  | P51692 | STAT5B  | P25791 | LMO2    | Q07869 | PPARA    |
| P18509 | ADCYAP1  | P42224 | STAT1   | P06400 | RB1     | Q03181 | PPARD    |
| P05121 | SERPINE1 | Q13285 | NR5A1   | P05451 | REG1A   | P62937 | PPIA     |
| P05120 | SERPINB2 | P53597 | SUCLG1  | Q04864 | REL     | P48736 | PIK3CG   |
| P25116 | F2R      | P07814 | EPRS    | P07949 | RET     | Q13393 | PLD1     |
| P05165 | PCCA     | P04053 | DNTT    | P61586 | RHOA    | P02776 | PF4      |
| P35558 | PCK1     | P24821 | TNC     | Q13464 | ROCK1   | P00747 | PLG      |
| P12004 | PCNA     | O14746 | TERT    | P35398 | RORA    | P11086 | PNMT     |
| Q13258 | PTGDR    | Q04206 | RELA    | P28702 | RXRB    | P25942 | CD40     |
| Q13370 | PDE3B    | Q03403 | TFF2    | P48443 | RXRG    | P25445 | FAS      |
| P04085 | PDGFA    | P02786 | TFRC    | P21817 | RYR1    | P28908 | TNFRSF8  |
| P01127 | PDGFB    | P13726 | F3      | P04271 | S100B   | P00750 | PLAT     |
| Q15118 | PDK1     | P21980 | TGM2    | P31949 | S100A11 | P17752 | TPH1     |
| P35408 | PTGER4   | P24557 | TBXAS1  | P21453 | S1PR1   | P19429 | TNNI3    |
| P36955 | SERPINF1 | P10827 | THRA    | Q99808 | SLC29A1 | P45379 | TNNT2    |
| P12955 | PEPD     | P10828 | THRB    | P31213 | SRD5A2  | P08138 | NGFR     |
| P11678 | EPX      | Q9BWD1 | ACAT2   | P14679 | TYR     | P20333 | TNFRSF1B |
| P16234 | PDGFRA   | P24752 | ACAT1   | P0CG47 | UBB     | P55851 | UCP2     |
| P09619 | PDGFRB   | P10599 | TXN     | P0CG48 | UBC     | P55916 | UCP3     |
| P00558 | PGK1     | P21580 | TNFAIP3 | Q05086 | UBE3A   | P11172 | UMPS     |
| P07585 | DCN      | P48023 | FASLG   | P25874 | UCP1    | Q13526 | PIN1     |
| P43119 | PTGIR    | P42336 | PIK3CA  | P42338 | PIK3CB  |        |          |

**Table S4 19 predicted ADRRPs that supported by scientific literatures**

| <i>Swiss-Prot ID</i> | <i>gene-name</i> | <i>related adverse drug reactions</i>    | <i>references</i> |
|----------------------|------------------|------------------------------------------|-------------------|
| Q15303               | ERBB4            | heart failure                            | 1, 2              |
| P10721               | KIT              | diarrhea                                 | 3                 |
| P07949               | RET              | constipation, hypertension               | 4-6,7, 8          |
| P35968               | VEGFR2           | hypertension, fatigue                    | 9,10-12           |
| P28222               | HTR1B            | vasospasm                                | 13                |
| P28335               | HTR2C            | poor satiety and increased food intake   | 14, 15            |
| Q01959               | SLC6A3           | hyperthermia and neuronal toxicity       | 16                |
| Q07869               | PPARA            | hepatotoxicity                           | 17                |
| P31751               | AKT2             | hyperglycemia                            | 18, 19            |
| P35222               | CTNNA1           | neurotoxicity                            | 20                |
| P15692               | VEGFA            | hypertension                             | 21-23             |
| P99999               | CYCS             | tumor promoter and acute intoxication    | 24                |
| P04406               | GAPDH            | endothelial dysfunction, lactic acidosis | 25,26             |
| P68871               | HBB              | bone marrow suppression                  | 27                |
| P23458               | JAK1             | immunosuppression                        | 28                |
| O14788               | RANKL            | inflammation and joint destruction       | 29                |
| P60484               | PTEN             | acquired long QT syndrome                | 30                |
| P08069               | IGF1R            | hearing loss                             | 31                |
| P08311               | CTSG             | painful peripheral neuropathy            | 32                |

## References

1. T. Horie, K. Ono, H. Nishi, K. Nagao, M. Kinoshita, S. Watanabe, Y. Kuwabara, Y. Nakashima, R. Takanabe-Mori, E. Nishi, K. Hasegawa, T. Kita and T. Kimura, *Cardiovasc. Res.*, 2010, **87**, 656-664.
2. S. J. Fuller, K. Sivarajah and P. H. Sugden, *J. Mol. Cell. Cardiol.*, 2008, **44**, 831-854.
3. M. J. Schlumberger, R. Elisei, L. Bastholt, L. J. Wirth, R. G. Martins, L. D. Locati, B. Jarzab, F. Pacini, C. Daumerie, J.-P. Droz, M. J. Eschenberg, Y.-N. Sun, T. Juan, D. E. Stepan and S. I. Sherman, *Journal Of Clinical Oncology*, 2009, **27**, 3794-3801.
4. P. Edery, A. Pelet, L. M. Mulligan, L. Abel, T. Attie, E. Dow, D. Bonneau, A. David, W. Flintoff and D. Jan, *Journal of medical genetics*, 1994, **31**, 602-606.
5. P. J. Svensson, M. Anvret, M. L. Molander and A. Nordenskjold, *Human Genetics*, 1998, **103**, 145-148.
6. S. K. King, B. R. Southwell and J. M. Hutson, *Journal Of Pediatric Surgery*, 2006, **41**, 437-442.
7. J. M. Dora, D. R. Siqueira, E. L. S. Meyer, M. K. Puraes and A. L. Maia, *Arquivos Brasileiros De Endocrinologia E Metabologia*, 2008, **52**, 1332-1336.
8. Z. Zhang, J. Quinlan, W. Hoy, M. D. Hughson, M. Lemire, T. Hudson, P.-A. Hueber, A. Benjamin, A. Roy, E. Pascuet, M. Goodyer, C. Raju, F. Houghton, J. Bertram and P. Goodyer, *Journal Of the American Society Of Nephrology*, 2008, **19**, 2027-2034.
9. J. P. Granger, *Hypertension*, 2009, **54**, 465-467.
10. M. J. Millward, C. House, D. Bowtell, L. Webster, I. N. Olver, M. Gore, M. Copeman, K. Lynch, A.

- Yap, Y. Wang, P. S. Cohen and J. Zalcberg, *British Journal Of Cancer*, 2006,**95**, 829-834.
11. M. G. Fury, A. Zahalsky, R. Wong, E. Venkatraman, E. Lis, L. Hann, T. Aliff, W. Gerald, M. Fleisher and D. G. Pfister, *Investigational New Drugs*, 2007,**25**, 165-172.
12. W. M. Stadler, D. C. Cao, N. J. Vogelzang, C. W. Ryan, K. Hoving, R. Wright, T. Karrison and E. E. Vokes, *Clinical Cancer Research*, 2004,**10**, 3365-3370.
13. S. Kiel, M. Bruss, H. Bonisch and M. Gothert, *Pharmacogenetics*, 2000,**10**, 655-666.
14. L. K. Heisler, M. A. Cowley, L. H. Tecott, W. Fan, M. J. Low, J. L. Smart, M. Rubinstein, J. B. Tatro, J. N. Marcus, H. Holstege, C. E. Lee, R. D. Cone and J. K. Elmquist, *Science*, 2002,**297**, 609-611.
15. S. P. Vickers, C. T. Dourish and G. A. Kennett, *Neuropharmacology*, 2001,**41**, 200-209.
16. I. Sora, M. Igari, H. Yamamoto and K. Ikeda, *Nihon yakurigaku zasshi. Folia pharmacologica Japonica*, 2007,**130**, 450-454.
17. W. Wang, R. Lin, J. Zhang, Y. Mao, X. Bu, Q. Ji, X. Zhai, Q. Lin, L. Yang and K. Zhang, *Human & Experimental Toxicology*, 2012,**31**, 1092-1101.
18. H. Cho, J. Mu, J. K. Kim, J. L. Thorvaldsen, Q. W. Chu, E. B. Crenshaw, K. H. Kaestner, M. S. Bartolomei, G. I. Shulman and M. J. Birnbaum, *Science*, 2001,**292**, 1728-1731.
19. M.-C. Crouthamel, J. A. Kahana, S. Korenchuk, S.-Y. Zhang, G. Sundaresan, D. J. Eberwein, K. K. Brown and R. Kumar, *Clin. Cancer Res.*, 2009,**15**, 217-225.
20. J. D. Godin, G. Poizat, M. A. Hickey, F. Maschat and S. Humbert, *Embo Journal*, 2010,**29**, 2433-2445.
21. J. R. Horowitz, A. Rivard, R. vanderZee, M. Hariawala, D. D. Sheriff, D. D. Esakof, G. M. Chaudhry, J. F. Symes and J. M. Isner, *Arteriosclerosis Thrombosis And Vascular Biology*, 1997,**17**, 2793-2800.
22. E. S. Robinson, E. V. Khankin, S. A. Karumanchi and B. D. Humphreys, *Semin. Nephrol.*, 2010,**30**, 591-601.
23. R. H. Yang, G. R. Thomas, S. Bunting, A. Ko, N. Ferrara, B. Keyt, J. Ross and H. K. Jin, *J. Cardiovasc. Pharmacol.*, 1996,**27**, 838-844.
24. M. Salvi and A. Toninello, *Toxicology And Applied Pharmacology*, 2001,**176**, 92-100.
25. M. B. Wolf and J. W. Baynes, *Biochimica Et Biophysica Acta-General Subjects*, 2006,**1760**, 267-271.
26. A. Yano, M. Kubota, K. Iguchi, S. Usui and K. Hirano, *Biological & Pharmaceutical Bulletin*, 2006,**29**, 1006-1009.
27. M. G. Spiga, D. A. Weidner, C. Trentesaux, R. D. LeBoeuf and J. P. Sommadossi, *Antiviral Research*, 1999,**44**, 167-177.
28. L. Vijaykrishnan, R. Venkataramanan and P. Gulati, *Trends In Pharmacological Sciences*, 2011,**32**, 25-34.
29. A. I. Idris, S. H. Ralston and R. J. van't Hof, *Eur. J. Pharmacol.*, 2009,**602**, 215-222.
30. X. Wan, A. T. Dennis, C. Obejero-Paz, J. L. Overholt, J. Heredia-Moya, K. L. Kirk and E. Ficker, *J. Biol. Chem.*, 2011,**286**, 2843-2852.
31. D. Wrzesniok, E. Buszman, E. Karna and J. Palka, *Pharmazie*, 2005,**60**, 439-443.
32. S. Arastu-Kapur, J. L. Anderl, M. Kraus, F. Parlati, K. D. Shenk, S. J. Lee, T. Muchamuel, M. K. Bennett, C. Driessen, A. J. Ball and C. J. Kirk, *Clin. Cancer Res.*, 2011,**17**, 2734-2743.

### File S5 The program for PubMed search

```
#!/usr/bin/perl
use LWP::Simple;
open(IN,"adrrpsefctchss.txt")||die"$!";##adrrpsefctchss.txt records the names of
predicted ADRRPs
open(OUT,">adrrpsefctch_text.txt")||die"$!";
my $utils = "http://www.ncbi.nlm.nih.gov/entrez/eutils/";
my $db = "pubmed";
my
$sideterm=('side+effect"[title/abstract])+OR+("side+effects"[title/abstract])+OR+("o
ff+target+effect"[title/abstract])+OR+("off+target+effects"[title/abstract])+OR+("adve
rse+event"[title/abstract])+OR+("adverse+events"[title/abstract])+OR+("adverse+reac
tion"[title/abstract])+OR+("adverse+reactions"[title/abstract])+OR+("toxicity"[title/ab
stract]');
my
$targetterm='target[title/abstract]+OR+associates[title/abstract]+OR+binds[title/abstra
ct]+OR+binding[title/abstract]+OR+interacts[title/abstract]+OR+acts[title/abstract]+
OR+actives[title/abstract]+OR+inhibits[title/abstract]';
my
$relation='cause[title/abstract]+OR+causes[title/abstract]+OR+caused[title/abstract]+
OR+("lead+to"[title/abstract])+OR+induces[title/abstract]+OR+induced[title/abstract]
+OR+induce[title/abstract]+OR+("results+in"[title/abstract]');

while(<IN>){
    chomp;
    my $query1 =$_;
    my
        $query
        =
        'journal+AND+(drug[title/abstract]+OR+compound[title/abstract]+OR+"small+molec
ule"[title/abstract]+OR+"small+molecules"[title/abstract]+OR+ligand[title/abstract])+
AND+'.("$sideterm.")."+AND+'.("$targetterm.")."+AND+'.("$relation.")."+
AND+'.("$query1.");
    my $esearch = $utils."esearch.fcgi?".
        "db=$db&usehistory=y&term=$query";
    my $esearch_result = get($esearch);
    my $web = $1 if ($esearch_result =~ /<WebEnv>(\$+)</WebEnv>/);
    my $key = $1 if ($esearch_result =~ /<QueryKey>(\d+)</QueryKey>/);
    my $count = $1 if ($esearch_result =~ /<Count>(\d+)</Count>/);
    #print OUT "$esearch_result\n";
    print OUT "$query1//TEXT_COUNT=$count\n";
    $retmax=1;
    for ($retstart=0;$retstart<$count;$retstart+= $retmax) {
        $efetch_url=$utils."efetch.fcgi?db=$db&WebEnv=$web";
        $efetch_url.="&query_key=$key&retstart=$retstart";
    }
}
```

```
        $fetch_url."&retmax=$retmax&rettype=abstract&retmode=text";  
        $fetch_out=get($fetch_url);  
        print OUT "$fetch_out\n";  
        # print OUT "$id\t$title\t$journal\t$ab_text\n";  
    }  
}  
close IN;  
close OUT;
```
